# Supplementary material for: Chromosome 9p21 in sporadic amyotrophic lateral sclerosis in the UK and seven other countries: a genome-wide association study
Source: PubMed Central journal article supplement (PMC3257853; doi:10.1016/s1474-4422(10)70197-6), 2010-10
Supplement: mmc1.pdf [file mmc1.pdf]

# THE LANCET **Neurology**

## **Supplementary webappendix**

This webappendix formed part of the original submission and has been peer reviewed. We post it as supplied by the authors.

This online publication has been corrected. The corrected version first appeared at [TheLancet.com/neurology](http://TheLancet.com/neurology) on February 21, 2011.

Supplement to: Shatunov A, Mok K, Newhouse S, et al. Chromosome 9p21 in sporadic amyotrophic lateral sclerosis in the UK and seven other countries: a genome-wide association study. *Lancet Neurol* 2010; published online Aug 31. DOI:10.1016/S1474-4422(10)70197-6.

## **Webappendix**

### **Web extra material for: Shatunov A, et al. Chromosome 9p21.2 is a replicable susceptibility locus for sporadic ALS**

#### **Detailed quality control protocol**

Quality control filters were applied to all samples simultaneously.

#### **1. Merging datasets**

SNP positions were updated to genome build NCBI36.3 (equivalent to hg18) and SNP strand aligned for all datasets; a common map was generated and datasets merged.\*

14143 individuals

4910 cases, 9233 controls

7937 males, 6204 females

265468 markers in common\*

#### **2. Initial sample quality control**

##### ***Sample sex mismatch***

The reported sex and the genetic sex were tested for mismatch.

59 individuals removed.

14084 individuals remaining

4872 cases, 9212 controls

7909 males, 6175 females

##### ***Exclusion of control individuals listed for exclusion by the Wellcome Trust Case Control Consortium (WTCCC)***

225 individuals removed

13859 individuals remaining

4872 cases, 8987 controls

7795 males, 6064 females

##### ***Exclusion of case individuals with non-white European ancestry***

To reduce the effects of population stratification, only those of white European ancestry were included in the analysis.

15 individuals removed

13844 individuals remaining

4857 cases, 8987 controls

7786 males, 6058 females

#### **3. Initial marker quality control**

##### ***Exclusion of markers listed for exclusion by WTCCC***

350 markers removed

265118 markers remaining.

##### ***Exclusion of markers showing non-random missing status between cases and controls***

Threshold for exclusion,  $P = 1 \times 10^{-5}$ .

11419 markers removed

253692 SNPs remaining.

##### ***Exclusion of SNPs showing non-random missing status by genotype***

This test was performed by analysing haplotypes around each SNP. Threshold for exclusion,  $P = 1 \times 10^{-5}$ .

20477 markers removed

233222 markers remaining

***Exclusion of SNPs with low minor allele frequency, low call rates and not in Hardy-Weinberg equilibrium in controls.***

Thresholds for exclusion: minor allele frequency  $< 0.001$ , call rate  $< 95\%$ , Hardy Weinberg test,  $P = 1 \times 10^{-6}$ .

0 markers removed for low frequency  
12 markers removed for low call rate  
179 markers removed for failing Hardy-Weinberg test in controls.  
233031 markers remaining

**4. Further general quality control measures**

***Exclusion of individuals with low genotyping rates***

Threshold for exclusion, genotyping rate  $< 95\%$ .  
13 individuals removed  
13831 individuals remaining  
4847 cases, 8984 controls  
7783 males, 6048 females  
Total genotyping rate in remaining individuals 0.998633

***Assessment of SNPs with outlier P-values***

Threshold for assessment,  $P \ll 1 \times 10^{-100}$ .

15 markers removed  
233016 SNPs remaining

***Exclusion of chromosome X markers***

5541 markers removed  
Final count:  
227475 markers remaining

**5. Tests using a reduced set of SNPs to identify relatedness**

These tests use a set of SNPs pruned to be in approximate linkage equilibrium (in our set, 74011 markers).

***Exclusion of individuals with low heterozygosity***

If the observed heterozygosity is lower than expected, this suggests inbreeding or poor genotyping quality. Threshold for exclusion,  $P < 0.05$ .

84 individuals removed  
12791 individuals left

***Exclusion of outliers for ancestry***

A multidimensional scaling plot was derived from the reduced set of SNPs. The first two axes were used to plot individuals based on ancestry. Those outside the main cluster were excluded.

54 individuals removed  
12737 individuals left

***Exclusion of cryptically related individuals***

Using the statistical genetics measure of relatedness,  $\pi$ -hat, which is the proportion of genetic variants identical by descent between two individuals. Thus, identical twins or duplicate samples, show  $\pi$ -hat = 1, siblings show  $\pi$ -hat = 0.5 etc. Threshold for exclusion,  $\pi$ -hat  $> 0.05$ . One individual of each pair was removed randomly.

474 individuals removed.

Final counts:  
12263 individuals remaining  
4133 cases, 8130 controls  
6873 males, 5390 females

\*SNP rs12608932 was missing from the DeCC and BACC control set (listed as UK\_MDEPR in Tables 2 and S1), but passed all other quality control measures. It was therefore retained to allow study of the *UNC13A* association. The loss of data for 1505 controls reduced power for detection of this SNP, with the equivalent values to those given in the Results as 0.73 power in the independent data and 0.77 power in the joint analysis.

#### **6. Controlling for population substructure**

The Eigenstrat package was used to analyse population substructure, using genotypes at 74011 SNPs as covariates to generate principal components axes (PCAs) for all 12791 individuals. The Twstats package was used to determine the optimal number of PCAs to use. This uses the Tracy-Widom distribution to estimate the optimal number of PCAs to include. Correction for substructure was not necessary in the independent analysis ( $\lambda_{GC} = 1.01$ ). In the joint analysis, correction was essential because of the multiple populations studied. After correction,  $\lambda_{GC} = 1.04$ , which suggests no inflation of the test statistic. The QQ plots provide additional evidence for this (Figures S1 and S2).

| Country            | <i>N</i>     | Cases       | Controls    | Male        | Female      | SNPs genotyped |
|--------------------|--------------|-------------|-------------|-------------|-------------|----------------|
| <b>Belgium</b>     | 645          | 304         | 341         | 330         | 315         | 317503         |
| <b>France</b>      | 975          | 251         | 724         | 836         | 139         | 307790         |
| <b>Netherlands</b> | 2113         | 1046        | 1067        | 1250        | 863         | 535468         |
| <b>Ireland</b>     | 432          | 221         | 211         | 231         | 201         | 561466         |
| <b>Italy</b>       | 540          | 277         | 263         | 291         | 249         | 535468         |
| <b>Sweden</b>      | 959          | 475         | 484         | 538         | 421         | 317503         |
| <b>USA</b>         | 1920         | 967         | 953         | 1110        | 810         | 307790         |
| <b>UK</b>          | 466          | 245         | 221         | 285         | 181         | 307790         |
|                    |              |             |             |             |             |                |
| <b>UK_MND</b>      | 663          | 663         | 0           | 424         | 239         | 584414         |
| <b>UK_MDEPR</b>    | 1589         | 0           | 1589        | 596         | 993         | 473508         |
| <b>UK_WTCCC</b>    | 2930         | 0           | 2930        | 1509        | 1421        | 1155595        |
|                    |              |             |             |             |             |                |
| <b>Total:</b>      | <b>13232</b> | <b>4449</b> | <b>8783</b> | <b>7400</b> | <b>5832</b> |                |
|                    |              |             |             |             |             |                |

**Supplementary Table S1. Characteristics of the component populations for the joint analysis before quality control.**

The last three rows refer to the independent study samples. UK refers to previously reported UK samples. For the independent study, UK\_MND refers to the UK National MND DNA Bank samples, UK\_MDEPR refers to controls from the DeCC and BACC studies and UK\_WTCCC refers to control samples from the 1958 Birth Cohort.

| Chromosome | SNP        | bp        | Minor allele | Odds ratio | P                       |
|------------|------------|-----------|--------------|------------|-------------------------|
| 9          | rs903603   | 27519316  | T            | 0.7132     | 8.92 x 10 <sup>-8</sup> |
| 9          | rs774359   | 27551049  | C            | 1.391      | 1.09 x 10 <sup>-6</sup> |
| 9          | rs3849942  | 27533281  | A            | 1.387      | 2.22 x 10 <sup>-6</sup> |
| 4          | rs2866197  | 101325339 | C            | 0.6776     | 2.52 x 10 <sup>-6</sup> |
| 9          | rs2814707  | 27526397  | A            | 1.378      | 3.32 x 10 <sup>-6</sup> |
| 11         | rs1522659  | 80518746  | A            | 0.727      | 5.93 x 10 <sup>-6</sup> |
| 8          | rs7003470  | 19386565  | A            | 1.455      | 8.91 x 10 <sup>-6</sup> |
| 2          | rs2177083  | 202669910 | C            | 0.7612     | 1.01 x 10 <sup>-5</sup> |
| 9          | rs7046653  | 27480967  | A            | 1.334      | 1.17 x 10 <sup>-5</sup> |
| 9          | rs1982915  | 27569560  | A            | 0.7623     | 1.37 x 10 <sup>-5</sup> |
| 3          | rs4684627  | 9231398   | C            | 0.731      | 1.45 x 10 <sup>-5</sup> |
| 8          | rs1494913  | 108957826 | G            | 0.7525     | 1.73 x 10 <sup>-5</sup> |
| 9          | rs10757665 | 27547919  | C            | 0.7128     | 1.90 x 10 <sup>-5</sup> |
| 8          | rs1389976  | 108959180 | G            | 0.7539     | 1.94 x 10 <sup>-5</sup> |
| 19         | rs11669124 | 44315092  | A            | 0.7518     | 2.34 x 10 <sup>-5</sup> |
| 13         | rs878765   | 93387165  | C            | 1.316      | 2.84 x 10 <sup>-5</sup> |
| 3          | rs11131163 | 9266861   | G            | 0.7504     | 3.76 x 10 <sup>-5</sup> |
| 16         | rs8053509  | 8769772   | G            | 1.41       | 4.33 x 10 <sup>-5</sup> |
| 11         | rs606087   | 93162290  | A            | 0.6233     | 4.60 x 10 <sup>-5</sup> |
| 20         | rs911168   | 58430478  | C            | 1.314      | 4.70 x 10 <sup>-5</sup> |
| 6          | rs9342307  | 92699953  | T            | 0.7704     | 5.59 x 10 <sup>-5</sup> |
| 5          | rs1614336  | 157484446 | C            | 1.286      | 5.80 x 10 <sup>-5</sup> |
| 7          | rs3736626  | 129137406 | G            | 1.284      | 5.97 x 10 <sup>-5</sup> |
| 21         | rs2836770  | 39236574  | G            | 1.277      | 6.19 x 10 <sup>-5</sup> |
| 5          | rs1173472  | 157488401 | T            | 1.367      | 6.19 x 10 <sup>-5</sup> |
| 5          | rs1423515  | 82098300  | A            | 1.597      | 6.99 x 10 <sup>-5</sup> |
| 22         | rs6004919  | 24785216  | T            | 1.495      | 7.01 x 10 <sup>-5</sup> |
| 2          | rs3769185  | 173721745 | T            | 0.7769     | 7.08 x 10 <sup>-5</sup> |
| 17         | rs17680211 | 14112411  | A            | 1.69       | 7.51 x 10 <sup>-5</sup> |
| 18         | rs1517166  | 59848277  | G            | 0.7842     | 8.11 x 10 <sup>-5</sup> |
| 8          | rs2957422  | 106345540 | G            | 0.6978     | 8.24 x 10 <sup>-5</sup> |
| 7          | rs1527307  | 141357368 | T            | 1.282      | 9.00 x 10 <sup>-5</sup> |
| 9          | rs1359637  | 115575231 | T            | 0.7838     | 9.25 x 10 <sup>-5</sup> |
| 12         | rs7298545  | 4542187   | C            | 1.295      | 9.51 x 10 <sup>-5</sup> |
| 11         | rs2726355  | 98960271  | C            | 0.7092     | 9.75 x 10 <sup>-5</sup> |
| 11         | rs7117574  | 98967675  | A            | 0.6517     | 9.79 x 10 <sup>-5</sup> |

**Supplementary Table S2. SNP associations at  $P < 1 \times 10^{-4}$  in the independent study based on an additive model in logistic regression.**

Five of the top ten SNPs are in the associated chromosome 9 region.

| Chromosome | SNP        | bp        | Minor allele | Odds ratio | P                        |
|------------|------------|-----------|--------------|------------|--------------------------|
| 9          | rs3849942  | 27533281  | A            | 1.219      | 4.64 x 10 <sup>-10</sup> |
| 9          | rs2814707  | 27526397  | A            | 1.218      | 4.72 x 10 <sup>-10</sup> |
| 9          | rs774359   | 27551049  | C            | 1.196      | 7.30 x 10 <sup>-9</sup>  |
| 9          | rs7046653  | 27480967  | A            | 1.175      | 8.48 x 10 <sup>-8</sup>  |
| 19         | rs12608932 | 17613689  | C            | 1.174      | 5.14 x 10 <sup>-8</sup>  |
| 9          | rs903603   | 27519316  | T            | 0.8627     | 1.37 x 10 <sup>-7</sup>  |
| 9          | rs4879515  | 27472235  | T            | 1.144      | 1.16 x 10 <sup>-6</sup>  |
| 11         | rs1488902  | 88984673  | C            | 1.145      | 3.06 x 10 <sup>-6</sup>  |
| 9          | rs1982915  | 27569560  | A            | 0.8811     | 4.89 x 10 <sup>-6</sup>  |
| 9          | rs10511816 | 27458461  | T            | 1.134      | 8.05 x 10 <sup>-6</sup>  |
| 18         | rs4799088  | 75674536  | G            | 0.8694     | 8.69 x 10 <sup>-6</sup>  |
| 9          | rs7852159  | 23565805  | G            | 0.8813     | 9.40 x 10 <sup>-6</sup>  |
| 8          | rs6999204  | 49730050  | C            | 1.289      | 1.39 x 10 <sup>-5</sup>  |
| 6          | rs6900980  | 34079204  | T            | 1.168      | 1.62 x 10 <sup>-5</sup>  |
| 10         | rs7904594  | 133584661 | T            | 1.143      | 2.19 x 10 <sup>-5</sup>  |
| 10         | rs10870270 | 133604324 | A            | 1.142      | 2.25 x 10 <sup>-5</sup>  |
| 7          | rs788718   | 45973069  | T            | 0.859      | 2.29 x 10 <sup>-5</sup>  |
| 17         | rs9909055  | 23620255  | T            | 0.8706     | 2.30 x 10 <sup>-5</sup>  |
| 17         | rs9944524  | 16153375  | G            | 0.8901     | 2.68 x 10 <sup>-5</sup>  |
| 13         | rs2256363  | 43716006  | T            | 1.143      | 3.17 x 10 <sup>-5</sup>  |
| 2          | rs3923566  | 113422642 | C            | 0.868      | 3.43 x 10 <sup>-5</sup>  |
| 21         | rs1735970  | 22045960  | A            | 0.8785     | 3.50 x 10 <sup>-5</sup>  |
| 11         | rs11823636 | 41488602  | C            | 0.8647     | 3.57 x 10 <sup>-5</sup>  |
| 20         | rs13045889 | 55858625  | T            | 1.197      | 3.82 x 10 <sup>-5</sup>  |
| 22         | rs470072   | 30593131  | T            | 1.12       | 4.43 x 10 <sup>-5</sup>  |
| 18         | rs1652373  | 19482645  | C            | 1.122      | 4.64 x 10 <sup>-5</sup>  |
| 13         | rs9533799  | 43706174  | A            | 1.123      | 4.69 x 10 <sup>-5</sup>  |
| 22         | rs136287   | 29522023  | A            | 1.145      | 5.11 x 10 <sup>-5</sup>  |
| 5          | rs2161123  | 109169426 | G            | 1.163      | 5.56 x 10 <sup>-5</sup>  |
| 5          | rs3797680  | 109188150 | C            | 1.161      | 6.54 x 10 <sup>-5</sup>  |
| 12         | rs2468411  | 67260873  | G            | 1.125      | 6.72 x 10 <sup>-5</sup>  |
| 11         | rs2017912  | 106578630 | T            | 1.316      | 6.83 x 10 <sup>-5</sup>  |
| 17         | rs5862     | 5343681   | G            | 0.895      | 7.07 x 10 <sup>-5</sup>  |
| 16         | rs9923415  | 79492360  | G            | 1.31       | 7.19 x 10 <sup>-5</sup>  |
| 13         | rs9542376  | 70026751  | A            | 1.14       | 7.21 x 10 <sup>-5</sup>  |
| 3          | rs2569944  | 145627635 | C            | 1.116      | 7.83 x 10 <sup>-5</sup>  |
| 12         | rs11613438 | 111964893 | A            | 0.89       | 8.13 x 10 <sup>-5</sup>  |
| 5          | rs9327807  | 137378377 | C            | 0.8639     | 9.07 x 10 <sup>-5</sup>  |
| 9          | rs10760706 | 101763513 | C            | 1.123      | 9.14 x 10 <sup>-5</sup>  |
| 1          | rs1776148  | 240109168 | A            | 1.119      | 9.20 x 10 <sup>-5</sup>  |
| 10         | rs4980270  | 124941369 | T            | 1.172      | 9.77 x 10 <sup>-5</sup>  |
| 9          | rs1997368  | 101753401 | C            | 1.122      | 9.94 x 10 <sup>-5</sup>  |

**Supplementary Table S3. SNP associations at  $P < 1 \times 10^{-4}$  in the joint analysis based on an additive model in logistic regression with 30 principal component axes to correct for population substructure.**

Eight of the top ten SNPs are in the associated chromosome 9 region.

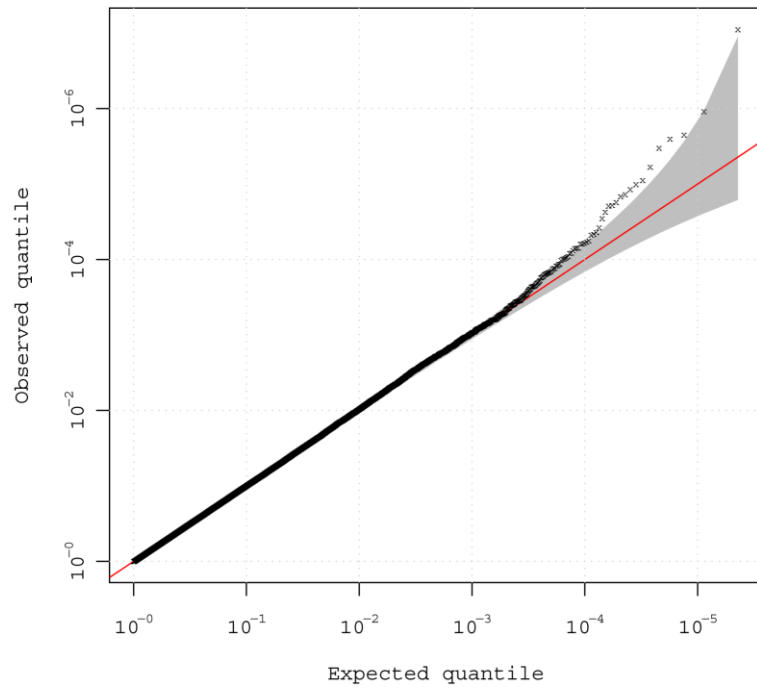

**Supplementary Figure S1. Q-Q plot for the independent study.**

The grey shaded area shows the 95% confidence limits for the expectation under the null hypothesis, shown in red. The test statistic is not inflated:  $\lambda_{GC} = 1.01$ .



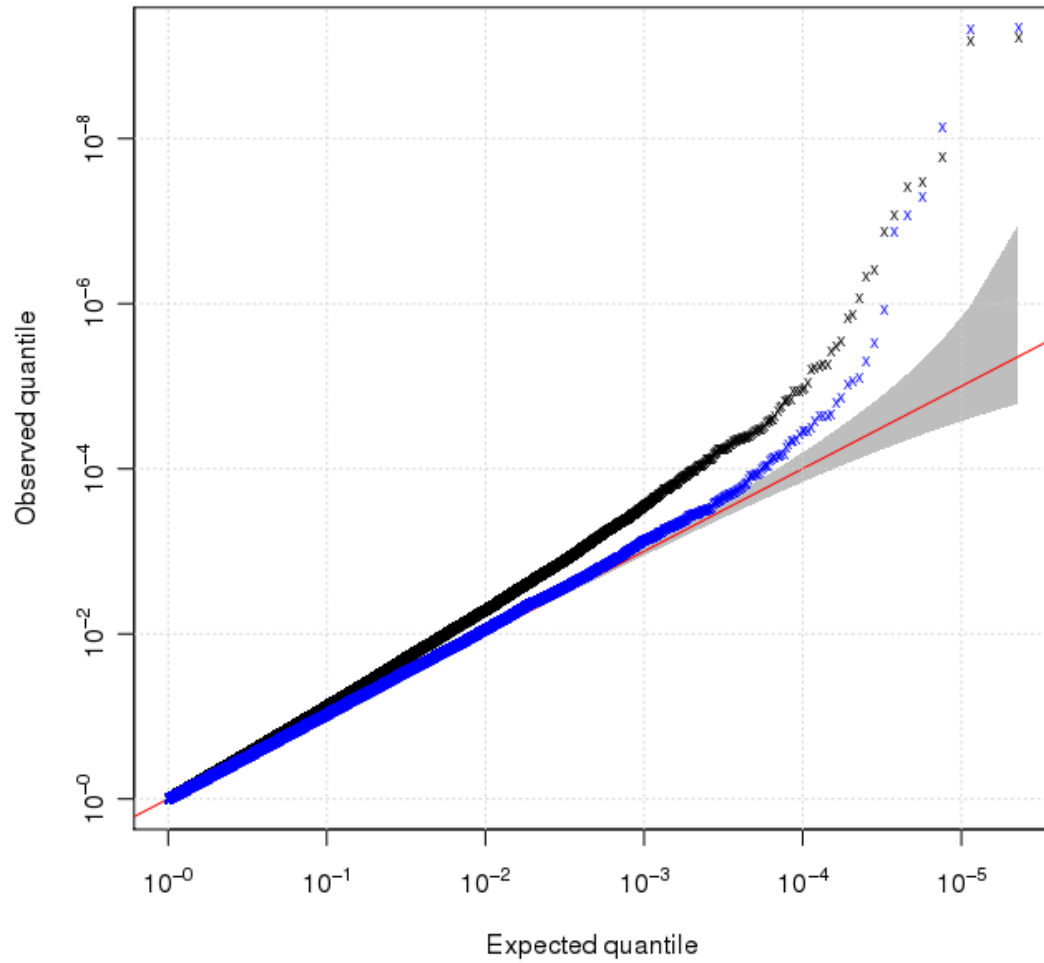

**Supplementary Figure S2. Q-Q plots for the joint analysis.**

The black shows the unadjusted and the blue the adjusted QQ plot after controlling for population stratification, with the red line showing the expectation under the null hypothesis, and the 95% confidence intervals in the shaded area. Before adjustment, the test statistic is clearly inflated. After adjustment, the test statistic is not inflated:  $\lambda_{GC} = 1.04$ , and the observed and expected lines tally well. The tail of the adjusted plot deviates upwards, consistent with true positive association.
